# Supplementary material for: Polygenic score for C-reactive protein is associated with accelerated cortical thinning and increased psychopathology in adolescents: a population-based longitudinal cohort study.
Source: Research Square preprint supplement (doi:10.21203/rs.3.rs-6823364/v1), 2025-06-30
Supplement: Supplementary file 1 [file a875a8b508bff90bb40572bc.docx]

**Supplementary Contents**

Contents

[Polygenic Score for C-reactive protein (PGS_CRP) computation 2](#_Toc187972398)

[Supplementary Table 1. Summary of PGS_CRP by Age Interaction Effects on Cortical Thickness 3](#_Toc187972399)

[Supplementary Table 2. Summary of PGS_CRP Effects on Psychopathology 9](#_Toc187972400)

[Supplementary Table 3. Summary of the Results from Mediation Pathways 9](#_Toc187972401)

[Supplementary Table 4. Summary of Biological Annotation Results 10](#_Toc187972402)

[Supplementary Table 5. Summary of PGS_CRP by Age Interaction Effects on Cortical Thickness Using Full Samples 11](#_Toc187972403)

[Supplementary Table 6. Summary of PGS_CRP Effects on Psychopathology Using Full Samples 13](#_Toc187972404)

[Citations 14](#_Toc187972405)

# **Polygenic Score for C-reactive protein (PGS_CRP) computation**

**Summary Statistic Acquisition and Cleaning:** The derived C-Reactive Protein (CRP) GWAS meta-analysis summary statistics used in this study to compute polygenic score for CRP (PGS_CRP) was downloaded from the GWAS catalogue under accession code GCST90029070 (<https://www.ebi.ac.uk/gwas/studies/GCST90029070>). Summary statistics were clean and aligned to genome build GRCh38 using the function, cleansumstats[2](https://www.zotero.org/google-docs/?MVXL13).

**ABCD Genetic Data:** Genetic data was collected using blood or saliva samples from participants of the ABCD study[3](https://www.zotero.org/google-docs/?77KXkF). A total of 656,247 genomic markers were measured using Smokescreen array[4](https://www.zotero.org/google-docs/?sy76OM). To increase the amount of overlap in genetic variants between the ABCD sample and summary statistics from previous GWAS, we imputed the markers from our Smokescreen array using the TOPMED imputation server[5](https://www.zotero.org/google-docs/?MdYrER). These imputed variants were fractional dosages and were converted to an integer number of alleles using a best guess threshold of 0.9 resulting in 280,850,795 imputed variants aligned to genome build GRCh38. After imputation target genetic data was restricted to only autosomal variants with a minor allele frequency of 1% (0.01) or greater leaving just under 11 million Single Nucleotide Polymorphisms (SNPs) in the target data. Genetic principal components were calculated from ABCD genetic data from the Smokescreen array using PC-Air[6](https://www.zotero.org/google-docs/?qXtDhK) with default settings.

**Polygenic Score Computation:** Best Practices for imputing polygenic scores in the ABCD are based on the results of a previous analysis that found that the Bayesian polygenic scoring method, PRScs[7](https://www.zotero.org/google-docs/?eqB6N8), maximized variance explained while maintaining a manageable computational load compared to other Bayesian and pruning and thresholding methods[8](https://www.zotero.org/google-docs/?TYRQ7L). Posterior effect sizes were generated using PRScs using 10,000 MCMC iterations and 5,000 burnin interactions. All other parameters were left at their default. LD reference panels required for this analysis were based on data from 1000 Genomes Phase 3 and matched the ancestry of the summary statistics. Posterior effect sizes were converted to polygenic scores using PLINK 2.0[9](https://www.zotero.org/google-docs/?rJzgUw).

# **Supplementary Table 1. Summary of PGS_CRP by Age Interaction Effects on Cortical Thickness**

| **brain.regions** | **Source of Results** | **Beta** | **std.error** | **P_value** | **p.FDR** |
| --- | --- | --- | --- | --- | --- |
| Left Banks of Superior Temporal Sulcus | Meta Analysis | -0.002 | 0.004 | 0.511 | 0.749 |
| Left caudalanteriorcingulate | Meta Analysis | 0.000 | 0.004 | 0.891 | 0.917 |
| Left caudalmiddlefrontal | Meta Analysis | 0.000 | 0.005 | 0.976 | 0.976 |
| Left cuneus | Meta Analysis | 0.000 | 0.004 | 0.892 | 0.917 |
| Left entorhinal | Meta Analysis | -0.014 | 0.005 | 0.011 | 0.153 |
| Left frontalpole | Meta Analysis | -0.004 | 0.012 | 0.708 | 0.838 |
| Left fusiform | Meta Analysis | -0.003 | 0.004 | 0.512 | 0.749 |
| Left inferiorparietal | Meta Analysis | -0.008 | 0.005 | 0.114 | 0.386 |
| Left inferiortemporal | Meta Analysis | -0.006 | 0.005 | 0.165 | 0.489 |
| Left insula | Meta Analysis | -0.006 | 0.005 | 0.299 | 0.644 |
| Left isthmuscingulate | Meta Analysis | -0.007 | 0.004 | 0.067 | 0.303 |
| Left lateraloccipital | Meta Analysis | -0.001 | 0.004 | 0.769 | 0.858 |
| Left lateralorbitofrontal | Meta Analysis | -0.004 | 0.005 | 0.401 | 0.730 |
| Left lingual | Meta Analysis | 0.004 | 0.007 | 0.549 | 0.749 |
| Left medialorbitofrontal | Meta Analysis | 0.003 | 0.005 | 0.590 | 0.749 |
| Left middletemporal | Meta Analysis | -0.009 | 0.005 | 0.058 | 0.298 |
| Left paracentral | Meta Analysis | -0.007 | 0.007 | 0.294 | 0.644 |
| Left parahippocampal | Meta Analysis | 0.000 | 0.004 | 0.904 | 0.917 |
| Left parsopercularis | Meta Analysis | -0.009 | 0.004 | 0.033 | 0.285 |
| Left parsorbitalis | Meta Analysis | -0.002 | 0.004 | 0.576 | 0.749 |
| Left parstriangularis | Meta Analysis | -0.003 | 0.005 | 0.536 | 0.749 |
| Left pericalcarine | Meta Analysis | 0.005 | 0.004 | 0.226 | 0.553 |
| Left postcentral | Meta Analysis | -0.002 | 0.004 | 0.591 | 0.749 |
| Left posteriorcingulate | Meta Analysis | -0.003 | 0.005 | 0.590 | 0.749 |
| Left precentral | Meta Analysis | -0.003 | 0.005 | 0.502 | 0.749 |
| Left precuneus | Meta Analysis | -0.004 | 0.004 | 0.373 | 0.719 |
| Left rostralanteriorcingulate | Meta Analysis | 0.005 | 0.005 | 0.285 | 0.644 |
| Left rostralmiddlefrontal | Meta Analysis | -0.001 | 0.005 | 0.792 | 0.865 |
| Left superiorfrontal | Meta Analysis | -0.004 | 0.004 | 0.386 | 0.722 |
| Left superiorparietal | Meta Analysis | -0.008 | 0.006 | 0.200 | 0.530 |
| Left superiortemporal | Meta Analysis | -0.007 | 0.004 | 0.083 | 0.311 |
| Left supramarginal | Meta Analysis | -0.005 | 0.006 | 0.427 | 0.749 |
| Left temporalpole | Meta Analysis | -0.009 | 0.006 | 0.135 | 0.437 |
| Left transversetemporal | Meta Analysis | -0.003 | 0.004 | 0.375 | 0.719 |
| Mean cortical thickness in mm for left hemisphere | Meta Analysis | -0.006 | 0.004 | 0.187 | 0.530 |
| Mean cortical thickness in mm for right hemisphere | Meta Analysis | -0.010 | 0.004 | 0.023 | 0.231 |
| Mean cortical thickness in mm for whole brain | Meta Analysis | -0.008 | 0.004 | 0.059 | 0.298 |
| Right Banks of Superior Temporal Sulcus | Meta Analysis | -0.006 | 0.003 | 0.076 | 0.303 |
| Right caudalanteriorcingulate | Meta Analysis | -0.002 | 0.006 | 0.702 | 0.838 |
| Right caudalmiddlefrontal | Meta Analysis | -0.005 | 0.005 | 0.324 | 0.677 |
| Right cuneus | Meta Analysis | 0.002 | 0.004 | 0.538 | 0.749 |
| Right entorhinal | Meta Analysis | -0.016 | 0.005 | 0.002 | 0.049 |
| Right frontalpole | Meta Analysis | 0.002 | 0.008 | 0.773 | 0.858 |
| Right fusiform | Meta Analysis | -0.007 | 0.004 | 0.112 | 0.386 |
| Right inferiorparietal | Meta Analysis | -0.006 | 0.011 | 0.602 | 0.749 |
| Right inferiortemporal | Meta Analysis | -0.008 | 0.004 | 0.074 | 0.303 |
| Right insula | Meta Analysis | -0.018 | 0.006 | 0.001 | 0.049 |
| Right isthmuscingulate | Meta Analysis | -0.008 | 0.007 | 0.222 | 0.553 |
| Right lateraloccipital | Meta Analysis | -0.002 | 0.005 | 0.720 | 0.838 |
| Right lateralorbitofrontal | Meta Analysis | -0.001 | 0.005 | 0.817 | 0.870 |
| Right lingual | Meta Analysis | 0.003 | 0.005 | 0.463 | 0.749 |
| Right medialorbitofrontal | Meta Analysis | -0.001 | 0.005 | 0.821 | 0.870 |
| Right middletemporal | Meta Analysis | -0.003 | 0.004 | 0.534 | 0.749 |
| Right paracentral | Meta Analysis | -0.003 | 0.004 | 0.446 | 0.749 |
| Right parahippocampal | Meta Analysis | -0.002 | 0.005 | 0.665 | 0.815 |
| Right parsopercularis | Meta Analysis | -0.008 | 0.004 | 0.051 | 0.298 |
| Right parsorbitalis | Meta Analysis | -0.011 | 0.006 | 0.044 | 0.285 |
| Right parstriangularis | Meta Analysis | -0.013 | 0.007 | 0.043 | 0.285 |
| Right pericalcarine | Meta Analysis | 0.003 | 0.006 | 0.586 | 0.749 |
| Right postcentral | Meta Analysis | -0.011 | 0.005 | 0.022 | 0.231 |
| Right posteriorcingulate | Meta Analysis | -0.005 | 0.008 | 0.523 | 0.749 |
| Right precentral | Meta Analysis | -0.010 | 0.005 | 0.042 | 0.285 |
| Right precuneus | Meta Analysis | -0.003 | 0.004 | 0.488 | 0.749 |
| Right rostralanteriorcingulate | Meta Analysis | -0.003 | 0.009 | 0.745 | 0.853 |
| Right rostralmiddlefrontal | Meta Analysis | -0.005 | 0.005 | 0.373 | 0.719 |
| Right superiorfrontal | Meta Analysis | -0.005 | 0.005 | 0.265 | 0.628 |
| Right superiorparietal | Meta Analysis | -0.012 | 0.007 | 0.077 | 0.303 |
| Right superiortemporal | Meta Analysis | -0.013 | 0.004 | 0.002 | 0.049 |
| Right supramarginal | Meta Analysis | -0.015 | 0.012 | 0.202 | 0.530 |
| Right temporalpole | Meta Analysis | -0.017 | 0.006 | 0.005 | 0.082 |
| Right transversetemporal | Meta Analysis | -0.006 | 0.004 | 0.144 | 0.446 |
| **brain.regions** | **Source of Results** | **Beta** | **std.error** | **P_value** | **p.FDR** |
| Left Banks of Superior Temporal Sulcus | EU Sample | 0.000 | 0.005 | 0.950 | 0.986 |
| Left caudalanteriorcingulate | EU Sample | 0.000 | 0.005 | 0.959 | 0.986 |
| Left caudalmiddlefrontal | EU Sample | -0.004 | 0.006 | 0.576 | 0.926 |
| Left cuneus | EU Sample | -0.001 | 0.005 | 0.831 | 0.986 |
| Left entorhinal | EU Sample | -0.015 | 0.007 | 0.036 | 0.516 |
| Left frontalpole | EU Sample | 0.007 | 0.006 | 0.248 | 0.836 |
| Left fusiform | EU Sample | -0.004 | 0.006 | 0.440 | 0.926 |
| Left inferiorparietal | EU Sample | -0.004 | 0.006 | 0.586 | 0.926 |
| Left inferiortemporal | EU Sample | -0.004 | 0.006 | 0.473 | 0.926 |
| Left insula | EU Sample | -0.004 | 0.008 | 0.621 | 0.928 |
| Left isthmuscingulate | EU Sample | -0.004 | 0.004 | 0.380 | 0.926 |
| Left lateraloccipital | EU Sample | 0.000 | 0.005 | 0.950 | 0.986 |
| Left lateralorbitofrontal | EU Sample | 0.000 | 0.006 | 0.983 | 0.990 |
| Left lingual | EU Sample | -0.003 | 0.005 | 0.587 | 0.926 |
| Left medialorbitofrontal | EU Sample | 0.001 | 0.007 | 0.907 | 0.986 |
| Left middletemporal | EU Sample | -0.007 | 0.006 | 0.207 | 0.836 |
| Left paracentral | EU Sample | -0.001 | 0.006 | 0.908 | 0.986 |
| Left parahippocampal | EU Sample | -0.003 | 0.004 | 0.400 | 0.926 |
| Left parsopercularis | EU Sample | -0.007 | 0.006 | 0.217 | 0.836 |
| Left parsorbitalis | EU Sample | -0.005 | 0.005 | 0.374 | 0.926 |
| Left parstriangularis | EU Sample | 0.000 | 0.006 | 0.990 | 0.990 |
| Left pericalcarine | EU Sample | 0.003 | 0.005 | 0.510 | 0.926 |
| Left postcentral | EU Sample | -0.002 | 0.005 | 0.655 | 0.928 |
| Left posteriorcingulate | EU Sample | 0.002 | 0.004 | 0.666 | 0.928 |
| Left precentral | EU Sample | -0.001 | 0.006 | 0.903 | 0.986 |
| Left precuneus | EU Sample | -0.001 | 0.005 | 0.886 | 0.986 |
| Left rostralanteriorcingulate | EU Sample | 0.007 | 0.007 | 0.307 | 0.926 |
| Left rostralmiddlefrontal | EU Sample | 0.003 | 0.006 | 0.609 | 0.928 |
| Left superiorfrontal | EU Sample | -0.003 | 0.006 | 0.648 | 0.928 |
| Left superiorparietal | EU Sample | -0.002 | 0.006 | 0.733 | 0.982 |
| Left superiortemporal | EU Sample | -0.008 | 0.005 | 0.116 | 0.822 |
| Left supramarginal | EU Sample | 0.001 | 0.006 | 0.918 | 0.986 |
| Left temporalpole | EU Sample | -0.006 | 0.008 | 0.416 | 0.926 |
| Left transversetemporal | EU Sample | -0.003 | 0.005 | 0.587 | 0.926 |
| Mean cortical thickness in mm for left hemisphere | EU Sample | -0.004 | 0.006 | 0.497 | 0.926 |
| Mean cortical thickness in mm for right hemisphere | EU Sample | -0.006 | 0.006 | 0.257 | 0.836 |
| Mean cortical thickness in mm for whole brain | EU Sample | -0.005 | 0.005 | 0.341 | 0.926 |
| Right Banks of Superior Temporal Sulcus | EU Sample | -0.006 | 0.005 | 0.186 | 0.836 |
| Right caudalanteriorcingulate | EU Sample | 0.004 | 0.004 | 0.408 | 0.926 |
| Right caudalmiddlefrontal | EU Sample | -0.009 | 0.007 | 0.202 | 0.836 |
| Right cuneus | EU Sample | 0.000 | 0.005 | 0.956 | 0.986 |
| Right entorhinal | EU Sample | -0.019 | 0.007 | 0.008 | 0.493 |
| Right frontalpole | EU Sample | 0.010 | 0.006 | 0.112 | 0.822 |
| Right fusiform | EU Sample | -0.009 | 0.006 | 0.114 | 0.822 |
| Right inferiorparietal | EU Sample | 0.005 | 0.006 | 0.430 | 0.926 |
| Right inferiortemporal | EU Sample | -0.006 | 0.006 | 0.259 | 0.836 |
| Right insula | EU Sample | -0.016 | 0.007 | 0.028 | 0.493 |
| Right isthmuscingulate | EU Sample | -0.002 | 0.004 | 0.689 | 0.941 |
| Right lateraloccipital | EU Sample | 0.003 | 0.005 | 0.527 | 0.926 |
| Right lateralorbitofrontal | EU Sample | 0.002 | 0.007 | 0.784 | 0.986 |
| Right lingual | EU Sample | -0.001 | 0.005 | 0.872 | 0.986 |
| Right medialorbitofrontal | EU Sample | 0.001 | 0.007 | 0.860 | 0.986 |
| Right middletemporal | EU Sample | 0.000 | 0.006 | 0.952 | 0.986 |
| Right paracentral | EU Sample | -0.001 | 0.006 | 0.811 | 0.986 |
| Right parahippocampal | EU Sample | -0.007 | 0.005 | 0.139 | 0.836 |
| Right parsopercularis | EU Sample | -0.009 | 0.005 | 0.111 | 0.822 |
| Right parsorbitalis | EU Sample | -0.006 | 0.005 | 0.222 | 0.836 |
| Right parstriangularis | EU Sample | -0.007 | 0.006 | 0.227 | 0.836 |
| Right pericalcarine | EU Sample | -0.002 | 0.005 | 0.655 | 0.928 |
| Right postcentral | EU Sample | -0.007 | 0.005 | 0.184 | 0.836 |
| Right posteriorcingulate | EU Sample | 0.003 | 0.005 | 0.552 | 0.926 |
| Right precentral | EU Sample | -0.012 | 0.007 | 0.080 | 0.822 |
| Right precuneus | EU Sample | -0.003 | 0.005 | 0.578 | 0.926 |
| Right rostralanteriorcingulate | EU Sample | 0.005 | 0.006 | 0.378 | 0.926 |
| Right rostralmiddlefrontal | EU Sample | -0.004 | 0.007 | 0.550 | 0.926 |
| Right superiorfrontal | EU Sample | -0.002 | 0.006 | 0.775 | 0.986 |
| Right superiorparietal | EU Sample | -0.005 | 0.007 | 0.401 | 0.926 |
| Right superiortemporal | EU Sample | -0.012 | 0.005 | 0.024 | 0.493 |
| Right supramarginal | EU Sample | -0.004 | 0.006 | 0.557 | 0.926 |
| Right temporalpole | EU Sample | -0.018 | 0.008 | 0.021 | 0.493 |
| Right transversetemporal | EU Sample | -0.007 | 0.005 | 0.180 | 0.836 |

| **brain.regions** | **Source of Results** | **Beta** | **std.error** | **P_value** | **p.FDR** |
| --- | --- | --- | --- | --- | --- |
| Left Banks of Superior Temporal Sulcus | NonEU Sample | -0.005 | 0.006 | 0.340 | 0.514 |
| Left caudalanteriorcingulate | NonEU Sample | 0.001 | 0.005 | 0.789 | 0.836 |
| Left caudalmiddlefrontal | NonEU Sample | 0.005 | 0.008 | 0.547 | 0.648 |
| Left cuneus | NonEU Sample | 0.000 | 0.006 | 0.962 | 0.966 |
| Left entorhinal | NonEU Sample | -0.012 | 0.008 | 0.141 | 0.351 |
| Left frontalpole | NonEU Sample | -0.016 | 0.007 | 0.027 | 0.139 |
| Left fusiform | NonEU Sample | -0.001 | 0.007 | 0.923 | 0.950 |
| Left inferiorparietal | NonEU Sample | -0.013 | 0.007 | 0.077 | 0.272 |
| Left inferiortemporal | NonEU Sample | -0.010 | 0.007 | 0.186 | 0.389 |
| Left insula | NonEU Sample | -0.008 | 0.008 | 0.322 | 0.508 |
| Left isthmuscingulate | NonEU Sample | -0.012 | 0.005 | 0.019 | 0.132 |
| Left lateraloccipital | NonEU Sample | -0.002 | 0.006 | 0.703 | 0.768 |
| Left lateralorbitofrontal | NonEU Sample | -0.010 | 0.008 | 0.200 | 0.406 |
| Left lingual | NonEU Sample | 0.012 | 0.005 | 0.035 | 0.164 |
| Left medialorbitofrontal | NonEU Sample | 0.005 | 0.008 | 0.498 | 0.622 |
| Left middletemporal | NonEU Sample | -0.010 | 0.007 | 0.148 | 0.351 |
| Left paracentral | NonEU Sample | -0.014 | 0.006 | 0.020 | 0.132 |
| Left parahippocampal | NonEU Sample | 0.005 | 0.005 | 0.278 | 0.476 |
| Left parsopercularis | NonEU Sample | -0.013 | 0.007 | 0.063 | 0.264 |
| Left parsorbitalis | NonEU Sample | 0.002 | 0.007 | 0.820 | 0.856 |
| Left parstriangularis | NonEU Sample | -0.007 | 0.007 | 0.337 | 0.514 |
| Left pericalcarine | NonEU Sample | 0.007 | 0.006 | 0.268 | 0.476 |
| Left postcentral | NonEU Sample | -0.002 | 0.006 | 0.760 | 0.818 |
| Left posteriorcingulate | NonEU Sample | -0.008 | 0.005 | 0.127 | 0.337 |
| Left precentral | NonEU Sample | -0.007 | 0.007 | 0.375 | 0.533 |
| Left precuneus | NonEU Sample | -0.008 | 0.006 | 0.222 | 0.426 |
| Left rostralanteriorcingulate | NonEU Sample | 0.004 | 0.008 | 0.650 | 0.732 |
| Left rostralmiddlefrontal | NonEU Sample | -0.008 | 0.008 | 0.318 | 0.508 |
| Left superiorfrontal | NonEU Sample | -0.006 | 0.007 | 0.423 | 0.566 |
| Left superiorparietal | NonEU Sample | -0.014 | 0.007 | 0.056 | 0.247 |
| Left superiortemporal | NonEU Sample | -0.005 | 0.006 | 0.422 | 0.566 |
| Left supramarginal | NonEU Sample | -0.011 | 0.008 | 0.128 | 0.337 |
| Left temporalpole | NonEU Sample | -0.012 | 0.009 | 0.178 | 0.384 |
| Left transversetemporal | NonEU Sample | -0.005 | 0.006 | 0.461 | 0.607 |
| Mean cortical thickness in mm for left hemisphere | NonEU Sample | -0.008 | 0.007 | 0.213 | 0.420 |
| Mean cortical thickness in mm for right hemisphere | NonEU Sample | -0.015 | 0.007 | 0.023 | 0.133 |
| Mean cortical thickness in mm for whole brain | NonEU Sample | -0.012 | 0.007 | 0.070 | 0.272 |
| Right Banks of Superior Temporal Sulcus | NonEU Sample | -0.006 | 0.005 | 0.236 | 0.441 |
| Right caudalanteriorcingulate | NonEU Sample | -0.009 | 0.005 | 0.073 | 0.272 |
| Right caudalmiddlefrontal | NonEU Sample | 0.000 | 0.008 | 0.966 | 0.966 |
| Right cuneus | NonEU Sample | 0.006 | 0.006 | 0.294 | 0.485 |
| Right entorhinal | NonEU Sample | -0.014 | 0.008 | 0.098 | 0.308 |
| Right frontalpole | NonEU Sample | -0.006 | 0.007 | 0.400 | 0.557 |
| Right fusiform | NonEU Sample | -0.004 | 0.007 | 0.566 | 0.659 |
| Right inferiorparietal | NonEU Sample | -0.017 | 0.007 | 0.020 | 0.132 |
| Right inferiortemporal | NonEU Sample | -0.010 | 0.007 | 0.147 | 0.351 |
| Right insula | NonEU Sample | -0.021 | 0.008 | 0.010 | 0.104 |
| Right isthmuscingulate | NonEU Sample | -0.015 | 0.005 | 0.002 | 0.084 |
| Right lateraloccipital | NonEU Sample | -0.008 | 0.006 | 0.173 | 0.384 |
| Right lateralorbitofrontal | NonEU Sample | -0.005 | 0.008 | 0.508 | 0.622 |
| Right lingual | NonEU Sample | 0.008 | 0.006 | 0.128 | 0.337 |
| Right medialorbitofrontal | NonEU Sample | -0.004 | 0.008 | 0.583 | 0.668 |
| Right middletemporal | NonEU Sample | -0.006 | 0.007 | 0.363 | 0.533 |
| Right paracentral | NonEU Sample | -0.006 | 0.007 | 0.373 | 0.533 |
| Right parahippocampal | NonEU Sample | 0.003 | 0.005 | 0.547 | 0.648 |
| Right parsopercularis | NonEU Sample | -0.007 | 0.006 | 0.253 | 0.461 |
| Right parsorbitalis | NonEU Sample | -0.018 | 0.007 | 0.007 | 0.104 |
| Right parstriangularis | NonEU Sample | -0.021 | 0.007 | 0.005 | 0.104 |
| Right pericalcarine | NonEU Sample | 0.010 | 0.006 | 0.112 | 0.331 |
| Right postcentral | NonEU Sample | -0.017 | 0.007 | 0.010 | 0.104 |
| Right posteriorcingulate | NonEU Sample | -0.014 | 0.005 | 0.010 | 0.104 |
| Right precentral | NonEU Sample | -0.009 | 0.008 | 0.282 | 0.476 |
| Right precuneus | NonEU Sample | -0.003 | 0.006 | 0.678 | 0.752 |
| Right rostralanteriorcingulate | NonEU Sample | -0.012 | 0.007 | 0.100 | 0.308 |
| Right rostralmiddlefrontal | NonEU Sample | -0.005 | 0.008 | 0.502 | 0.622 |
| Right superiorfrontal | NonEU Sample | -0.010 | 0.007 | 0.173 | 0.384 |
| Right superiorparietal | NonEU Sample | -0.019 | 0.007 | 0.012 | 0.109 |
| Right superiortemporal | NonEU Sample | -0.015 | 0.007 | 0.026 | 0.139 |
| Right supramarginal | NonEU Sample | -0.028 | 0.007 | 0.000 | 0.007 |
| Right temporalpole | NonEU Sample | -0.015 | 0.009 | 0.100 | 0.308 |
| Right transversetemporal | NonEU Sample | -0.004 | 0.006 | 0.496 | 0.622 |

|  |  |  |  |  |  |
| --- | --- | --- | --- | --- | --- |

# **Supplementary Table 2. Summary of PGS_CRP Effects on Psychopathology**

| Exposure | Outcomes | Source of results | beta | std.error | *p* | *p*.FDR |
| --- | --- | --- | --- | --- | --- | --- |
| PGS_CRP | Depression | EU Sample | -0.115 | 0.085 | 0.176 | 0.371 |
| PGS_CRP | Internalizing | EU Sample | -0.122 | 0.078 | 0.119 | 0.312 |
| PGS_CRP | Externalizing | EU Sample | 0.103 | 0.073 | 0.161 | 0.371 |
| PGS_CRP | Depression | Non-EU Sample | 0.224 | 0.095 | 0.019 | 0.031 |
| PGS_CRP | Internalizing | Non-EU Sample | 0.207 | 0.088 | 0.019 | 0.031 |
| PGS_CRP | Externalizing | Non-EU Sample | 0.242 | 0.083 | 0.003 | 0.012 |
| PGS_CRP | Depression | Meta-analysis | 0.051 | 0.170 | 0.761 | 0.809 |
| PGS_CRP | Internalizing | Meta-analysis | 0.040 | 0.164 | 0.809 | 0.809 |
| PGS_CRP | Externalizing | Meta-analysis | 0.167 | 0.069 | 0.016 | 0.048 |

# **Supplementary Table 3. Summary of Early-Life Infection Effects on Psychopathology**

| Exposure | Outcomes | Source of results | beta | std.error | *p* | *p*.FDR |
| --- | --- | --- | --- | --- | --- | --- |
| Early-Life Infection | Depression | EU Sample | 0.312 | 0.182 | 0.087 | 0.312 |
| Early-Life Infection | Internalizing | EU Sample | 0.263 | 0.167 | 0.114 | 0.312 |
| Early-Life Infection | Externalizing | EU Sample | 0.382 | 0.157 | 0.015 | 0.104 |
| Early-Life Infection | Depression | Non-EU Sample | 0.224 | 0.096 | 0.019 | 0.031 |
| Early-Life Infection | Internalizing | Non-EU Sample | 0.207 | 0.088 | 0.019 | 0.031 |
| Early-Life Infection | Externalizing | Non-EU Sample | 0.242 | 0.083 | 0.004 | 0.012 |
| Early-Life Infection | Depression | Meta-analysis | 0.511 | 0.232 | 0.028 | 0.042 |
| Early-Life Infection | Internalizing | Meta-analysis | 0.608 | 0.363 | 0.094 | 0.094 |
| Early-Life Infection | Externalizing | Meta-analysis | 0.589 | 0.232 | 0.011 | 0.034 |

# **Supplementary Table 4. Summary of the Results from Mediation Pathways**

| Direct Effect | Outcomes | beta | std.error | *p* | *p*.FDR |
| --- | --- | --- | --- | --- | --- |
| PGS_CRP | Mean Cortical Thickness Change | 0.032 | 0.008 | <0.001 | <0.001 |
| PGS_CRP | Depression | <0.001 | 0.011 | 0.966 | 0.966 |
| PGS_CRP | Internalizing | -0.026 | 0.012 | 0.004 | 0.043 |
| PGS_CRP | Externalizing | 0.033 | 0.011 | 0.004 | 0.008 |
| Mean Cortical Thickness Change | Depression | 0.053 | 0.019 | 0.005 | 0.010 |
| Mean Cortical Thickness Change | Internalizing | 0.040 | 0.019 | 0.036 | 0.051 |
| Mean Cortical Thickness Change | Externalizing | 0.063 | 0.019 | 0.001 | 0.002 |
| Indirect Effect |  | beta | std.error | *p* | *p*.FDR |
| Mean Cortical Thickness Change | Depression | 0.002 | 0.001 | 0.022 | 0.036 |
| Mean Cortical Thickness Change | Internalizing | 0.001 | 0.001 | 0.054 | 0.072 |
| Mean Cortical Thickness Change | Externalizing | 0.002 | 0.001 | 0.008 | 0.014 |
| Total Effect |  | beta | std.error | *p* | *p*.FDR |
| PGS_CRP | Depression | 0.001 | 0.011 | 0.915 | 0.966 |
| PGS_CRP | Internalizing | -0.024 | 0.012 | 0.037 | 0.051 |
| PGS_CRP | Externalizing | 0.035 | 0.011 | 0.002 | 0.005 |

# **Supplementary Table 5. Summary of Biological Annotation Results**

| receptors | names | r | *p* | *p*.FDR |
| --- | --- | --- | --- | --- |
| 5HT1A | Serotonin 1A receptor | -0.160 | 0.069 | 0.224 |
| 5HT1B | Serotonin 1B receptor | -0.044 | 0.376 | 0.533 |
| 5HT2A | Serotonin 2A receptor | -0.052 | 0.277 | 0.428 |
| 5HT4 | Serotonin 4 receptor | -0.014 | 0.881 | 0.881 |
| 5HT6 | Serotonin 6 receptor | -0.250 | 0.010 | 0.085 |
| 5HTT | Serotonin transporter | -0.135 | 0.198 | 0.371 |
| CB1 | Cannabinoid receptor type 1 | -0.228 | 0.020 | 0.085 |
| D1 | Dopamine receptor D1 | -0.119 | 0.218 | 0.371 |
| D2 | Dopamine receptor D2 | -0.117 | 0.079 | 0.224 |
| DAT | Dopamine transporter | -0.069 | 0.525 | 0.638 |
| GABAA | Gamma-Aminobutyric Acid A receptor | -0.274 | 0.010 | 0.085 |
| H3 | Histamine H3 receptor | 0.065 | 0.436 | 0.570 |
| M1 | Muscarinic acetylcholine receptor M1 | -0.127 | 0.208 | 0.371 |
| mGluR5 | Metabotropic glutamate receptor 5 | -0.253 | 0.020 | 0.085 |
| MOR | Mu-opioid receptor | 0.034 | 0.673 | 0.715 |
| NET | Norepinephrine transporter | 0.049 | 0.584 | 0.662 |
| VAChT | Vesicular acetylcholine transporter | -0.147 | 0.139 | 0.338 |

# **Supplementary Table 6. Summary of PGS_CRP by Age Interaction Effects on Cortical Thickness Using Full Samples**

| Sub regions | beta | Std.Error | t.value | *p* | *p*.FDR |
| --- | --- | --- | --- | --- | --- |
| Left Banks of Superior Temporal Sulcus | -0.004 | 0.004 | -1.150 | 0.250 | 0.414 |
| Left caudalanteriorcingulate | 0.000 | 0.003 | 0.123 | 0.902 | 0.924 |
| Left caudalmiddlefrontal | -0.001 | 0.005 | -0.177 | 0.859 | 0.911 |
| Left cuneus | -0.001 | 0.003 | -0.385 | 0.701 | 0.777 |
| Left entorhinal | -0.014 | 0.005 | -2.637 | 0.008 | 0.050 |
| Left fusiform | -0.003 | 0.004 | -0.731 | 0.465 | 0.579 |
| Left inferiorparietal | -0.009 | 0.005 | -1.907 | 0.057 | 0.177 |
| Left inferiortemporal | -0.006 | 0.004 | -1.415 | 0.157 | 0.319 |
| Left isthmuscingulate | -0.008 | 0.003 | -2.593 | 0.010 | 0.052 |
| Left lateraloccipital | -0.002 | 0.004 | -0.444 | 0.657 | 0.741 |
| Left lateralorbitofrontal | -0.006 | 0.005 | -1.359 | 0.174 | 0.326 |
| Left lingual | 0.003 | 0.003 | 0.877 | 0.380 | 0.519 |
| Left medialorbitofrontal | 0.001 | 0.005 | 0.158 | 0.874 | 0.913 |
| Left middletemporal | -0.009 | 0.004 | -2.029 | 0.042 | 0.159 |
| Left parahippocampal | 0.000 | 0.003 | -0.111 | 0.911 | 0.924 |
| Left paracentral | -0.009 | 0.004 | -2.157 | 0.031 | 0.126 |
| Left parsopercularis | -0.009 | 0.004 | -2.146 | 0.032 | 0.126 |
| Left parsorbitalis | -0.003 | 0.004 | -0.810 | 0.418 | 0.540 |
| Left parstriangularis | -0.005 | 0.005 | -1.187 | 0.235 | 0.414 |
| Left pericalcarine | 0.004 | 0.004 | 1.055 | 0.291 | 0.444 |
| Left postcentral | -0.003 | 0.004 | -0.818 | 0.414 | 0.540 |
| Left posteriorcingulate | -0.004 | 0.003 | -1.149 | 0.251 | 0.414 |
| Left precentral | -0.005 | 0.005 | -0.988 | 0.323 | 0.468 |
| Left precuneus | -0.006 | 0.004 | -1.609 | 0.108 | 0.273 |
| Left rostralanteriorcingulate | 0.005 | 0.005 | 1.037 | 0.300 | 0.444 |
| Left rostralmiddlefrontal | -0.004 | 0.005 | -0.936 | 0.349 | 0.496 |
| Left superiorfrontal | -0.005 | 0.004 | -1.099 | 0.272 | 0.439 |
| Left superiorparietal | -0.009 | 0.005 | -1.900 | 0.057 | 0.177 |
| Left superiortemporal | -0.008 | 0.004 | -1.942 | 0.052 | 0.177 |
| Left supramarginal | -0.006 | 0.005 | -1.366 | 0.172 | 0.326 |
| Left frontalpole | -0.005 | 0.005 | -1.035 | 0.301 | 0.444 |
| Left temporalpole | -0.009 | 0.006 | -1.491 | 0.136 | 0.311 |
| Left transversetemporal | -0.005 | 0.004 | -1.351 | 0.177 | 0.326 |
| Left insula | -0.008 | 0.005 | -1.435 | 0.151 | 0.316 |
| Right Banks of Superior Temporal Sulcus | -0.008 | 0.003 | -2.375 | 0.018 | 0.083 |
| Right caudalanteriorcingulate | -0.002 | 0.003 | -0.668 | 0.504 | 0.606 |
| Right caudalmiddlefrontal | -0.005 | 0.005 | -1.075 | 0.283 | 0.444 |
| Right cuneus | 0.000 | 0.003 | 0.065 | 0.948 | 0.948 |
| Right entorhinal | -0.016 | 0.005 | -3.121 | 0.002 | 0.024 |
| Right fusiform | -0.006 | 0.004 | -1.516 | 0.129 | 0.306 |
| Right inferiorparietal | -0.007 | 0.005 | -1.444 | 0.149 | 0.316 |
| Right inferiortemporal | -0.007 | 0.004 | -1.725 | 0.085 | 0.231 |
| Right isthmuscingulate | -0.008 | 0.003 | -2.649 | 0.008 | 0.050 |
| Right lateraloccipital | -0.003 | 0.003 | -0.784 | 0.433 | 0.549 |
| Right lateralorbitofrontal | -0.003 | 0.005 | -0.568 | 0.570 | 0.663 |
| Right lingual | 0.002 | 0.003 | 0.715 | 0.475 | 0.581 |
| Right medialorbitofrontal | -0.003 | 0.005 | -0.616 | 0.538 | 0.637 |
| Right middletemporal | -0.002 | 0.004 | -0.489 | 0.625 | 0.715 |
| Right parahippocampal | -0.003 | 0.003 | -0.887 | 0.375 | 0.519 |
| Right paracentral | -0.005 | 0.004 | -1.178 | 0.239 | 0.414 |
| Right parsopercularis | -0.009 | 0.004 | -2.225 | 0.026 | 0.116 |
| Right parsorbitalis | -0.012 | 0.004 | -3.094 | 0.002 | 0.024 |
| Right parstriangularis | -0.015 | 0.005 | -3.317 | 0.001 | 0.022 |
| Right pericalcarine | 0.001 | 0.004 | 0.305 | 0.761 | 0.818 |
| Right postcentral | -0.012 | 0.004 | -3.141 | 0.002 | 0.024 |
| Right posteriorcingulate | -0.006 | 0.004 | -1.738 | 0.082 | 0.231 |
| Right precentral | -0.009 | 0.005 | -1.921 | 0.055 | 0.177 |
| Right precuneus | -0.006 | 0.004 | -1.440 | 0.150 | 0.316 |
| Right rostralanteriorcingulate | -0.004 | 0.005 | -0.836 | 0.403 | 0.540 |
| Right rostralmiddlefrontal | -0.008 | 0.005 | -1.587 | 0.113 | 0.275 |
| Right superiorfrontal | -0.006 | 0.005 | -1.343 | 0.179 | 0.326 |
| Right superiorparietal | -0.013 | 0.005 | -2.841 | 0.005 | 0.038 |
| Right superiortemporal | -0.014 | 0.004 | -3.339 | 0.001 | 0.022 |
| Right supramarginal | -0.014 | 0.005 | -3.046 | 0.002 | 0.024 |
| Right frontalpole | 0.002 | 0.005 | 0.341 | 0.733 | 0.801 |
| Right temporalpole | -0.015 | 0.006 | -2.674 | 0.008 | 0.050 |
| Right transversetemporal | -0.006 | 0.004 | -1.661 | 0.097 | 0.255 |
| Right insula | -0.018 | 0.005 | -3.460 | 0.001 | 0.022 |
| Mean cortical thickness in mm for left hemisphere | -0.007 | 0.004 | -1.793 | 0.073 | 0.216 |
| Mean cortical thickness in mm for right hemisphere | -0.012 | 0.004 | -2.820 | 0.005 | 0.038 |
| Mean cortical thickness in mm for whole brain | -0.010 | 0.004 | -2.383 | 0.017 | 0.083 |

# **Supplementary Table 7. Summary of PGS_CRP Effects on Psychopathology Using Full Sample**

| Exposure | Outcomes | Source of results | beta | std.error | *p* | *p*.FDR |
| --- | --- | --- | --- | --- | --- | --- |
| PGS_CRP | Depression | Full Sample | 0.070 | 0.062 | 0.258 | 0.362 |
| PGS_CRP | Internalizing | Full Sample | 0.064 | 0.057 | 0.263 | 0.362 |
| PGS_CRP | Externalizing | Full Sample | 0.167 | 0.054 | 0.002 | 0.007 |

# **Supplementary Table 8. Summary of Early-Life Infection Effects on Psychopathology Using Full Sample**

| Exposure | Outcomes | Source of results | beta | std.error | *p* | *p*.FDR |
| --- | --- | --- | --- | --- | --- | --- |
| Early-Life Infection | Depression | Full Sample | 0.431 | 0.147 | 0.003 | 0.010 |
| Early-Life Infection | Internalizing | Full Sample | 0.486 | 0.134 | 0.000 | 0.001 |
| Early-Life Infection | Externalizing | Full Sample | 0.541 | 0.126 | 0.000 | <0.001 |

# Citations

[1. Sollis, E. *et al.* The NHGRI-EBI GWAS Catalog: knowledgebase and deposition resource. *Nucleic Acids Res.* **51**, D977–D985 (2023).](https://www.zotero.org/google-docs/?HLnasU)

[2. Gadin, J. R., Zetterberg, R., Meijsen, J. & Schork, A. J. Cleansumstats: Converting GWAS sumstats to a common format to facilitate downstream applications. Zenodo https://doi.org/10.5281/zenodo.7540572 (2022).](https://www.zotero.org/google-docs/?HLnasU)

[3. Uban, K. A. *et al.* Biospecimens and the ABCD study: Rationale, methods of collection, measurement and early data. *Dev. Cogn. Neurosci.* **32**, 97–106 (2018).](https://www.zotero.org/google-docs/?HLnasU)

[4. Baurley, J. W., Edlund, C. K., Pardamean, C. I., Conti, D. V. & Bergen, A. W. Smokescreen: a targeted genotyping array for addiction research. *BMC Genomics* **17**, 145 (2016).](https://www.zotero.org/google-docs/?HLnasU)

[5. Taliun, D. *et al.* Sequencing of 53,831 diverse genomes from the NHLBI TOPMed Program. *Nature* **590**, 290–299 (2021).](https://www.zotero.org/google-docs/?HLnasU)

[6. Conomos, M. P., Miller, M. B. & Thornton, T. A. Robust inference of population structure for ancestry prediction and correction of stratification in the presence of relatedness. *Genet. Epidemiol.* **39**, 276–293 (2015).](https://www.zotero.org/google-docs/?HLnasU)

[7. Ge, T., Chen, C.-Y., Ni, Y., Feng, Y.-C. A. & Smoller, J. W. Polygenic prediction via Bayesian regression and continuous shrinkage priors. *Nat. Commun.* **10**, 1776 (2019).](https://www.zotero.org/google-docs/?HLnasU)

[8. Ahern, J., Thompson, W., Fan, C. C. & Loughnan, R. Comparing Pruning and Thresholding with Continuous Shrinkage Polygenic Score Methods in a Large Sample of Ancestrally Diverse Adolescents from the ABCD Study®. *Behav. Genet.* **53**, 292–309 (2023).](https://www.zotero.org/google-docs/?HLnasU)

[9. Purcell, S. *et al.* PLINK: A Tool Set for Whole-Genome Association and Population-Based Linkage Analyses. *Am. J. Hum. Genet.* **81**, 559–575 (2007).](https://www.zotero.org/google-docs/?HLnasU)
